# Supplementary material for: Sepsis recognition in the emergency department – impact on quality of care and outcome?
Source: PubMed Central journal article supplement (PMC5363055; doi:10.1186/s12873-017-0122-9), 2017-03-23
Supplement: 12873_2017_122_MOESM1_ESM.pdf [file 12873_2017_122_MOESM1_ESM.pdf]

## Additional file 1

### Sepsis recognition in the emergency department - impact on quality of care and outcome?

Marius Morr, Alexander Lukasz, Eva Rübiger, Hermann Pavenstädt, Philipp Kümpers

#### Baseline characteristics of all included patients

| Variable                                   | Total       | No infection | Infection   | P value |
|--------------------------------------------|-------------|--------------|-------------|---------|
| <b>Demographics</b>                        |             |              |             |         |
| Number of patients, n (%)                  | 487 (100)   | 377 (77.4)   | 110 (22.6)  |         |
| Age in years, median (IQR)                 | 58 (41–72)  | 57 (40–72)   | 59 (44–73)  | 0.5     |
| Female sex, n (%)                          | 197 (40.5)  | 151 (40.1)   | 46 (41.8)   | 0.7     |
| <b>Primary reason for admission, n (%)</b> |             |              |             |         |
| Cardiovascular                             |             | 203 (53.8)   | 0           |         |
| Gastrointestinal                           |             | 53 (14.1)    | 0           |         |
| Respiratory                                |             | 37 (9.8)     | 0           |         |
| Nephrologic/ rheumatologic                 |             | 31 (8.2)     | 0           |         |
| Hematologic                                |             | 12 (3.2)     | 0           |         |
| Intoxication/drug-related                  |             | 9 (2.4)      | 0           |         |
| Other                                      |             | 32 (8.5)     | 0           |         |
| Infection                                  |             | 0            | 110 (100)   |         |
| <b>SIRS criteria</b>                       |             |              |             |         |
| Positive SIRS criteria, n (%)              |             |              |             | <0.0001 |
| 0                                          | 264 (54.2)  | 244 (64.7)   | 20 (18.2)   |         |
| 1                                          | 143 (29.4)  | 107 (28.4)   | 36 (32.7)   |         |
| 2                                          | 49 (10.1)   | 21 (5.6)     | 28 (25.5)   |         |
| 3                                          | 26 (5.3)    | 5 (1.3)      | 21 (19.1)   |         |
| 4                                          | 5 (1)       | 0 (0)        | 5 (4.5)     |         |
| SIRS, mean/median (IQR)                    | 0.7/0 (0–1) | 0.4/0 (0–1)  | 1.6/1 (1–2) | <0.0001 |
| Heart rate in beats per min, median (IQR)  | 80 (68–96)  | 77 (66–92)   | 92 (80–106) | <0.0001 |

|                                     |                  |                  |                  |         |
|-------------------------------------|------------------|------------------|------------------|---------|
| Respiratory rate, breaths/min (IQR) | 14 (12–18)       | 14 (12–17)       | 16 (13–20)       | <0.0001 |
| Temperature in °C, median (IQR)     | 36.2 (36.0–36.7) | 36.2 (36.0–36.5) | 37.2 (36.1–38.4) | <0.0001 |
| Leukocytes (×1000/μL)               | 8.1 (6.2–10.3)   | 7.8 (6.2–9.7)    | 10 (5.8–13.7)    | 0.006   |
| <b>Additional clinical data</b>     |                  |                  |                  |         |
| MAP in mmHg, median (IQR)           | 98 (90–109)      | 101 (92–111)     | 92 (83–102)      | <0.0001 |
| CRP in mg/dL, median (IQR)          | <0.5 (<0.5–3.5)  | <0.5 (<0.5–0.9)  | 8.6 (2.8–14.6)   | <0.0001 |
| Lactate mmol/L                      | 0.9 (0.7–1.5)    | 0.9 (0.7–1.5)    | 0.9 (0.7–1.4)    | 0.9     |
| Hospitalization, n (%)              | 159 (53.2)       | 168 (44.6)       | 91 (82.7)        | <0.0001 |

Median and interquartile range reported for continuous variables and frequency; percentage reported for categorical variables. Differences between patients with/without infection were calculated using the Mann–Whitney U test for continuous variables and chi-square test for categorical variables. Two-sided p values <0.05 were considered statistically significant. SIRS, systemic inflammatory response syndrome; MAP, mean arterial pressure; CRP, C-reactive protein.
