# Supplementary material for: Sepsis recognition in the emergency department – impact on quality of care and outcome?
Source: PubMed Central journal article supplement (PMC5363055; doi:10.1186/s12873-017-0122-9), 2017-03-23
Supplement: 12873_2017_122_MOESM4_ESM.pdf [file 12873_2017_122_MOESM4_ESM.pdf]

## Additional file 4

### Sepsis recognition in the emergency department - impact on quality of care and outcome?

Marius Morr, Alexander Lukasz, Eva Rübiger, Hermann Pavenstädt, Philipp Kümpers

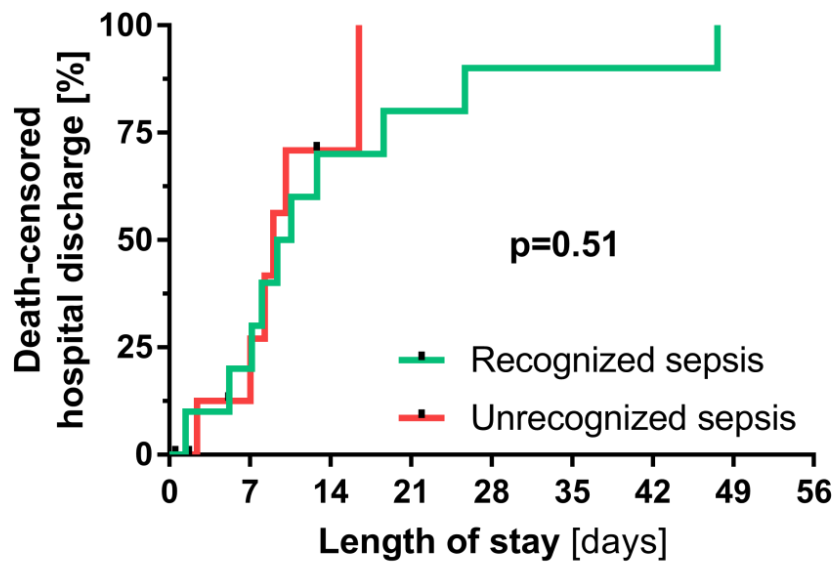

**Death-censored length of hospital stay according to severe sepsis recognition (ACCP/SCCM definitions).** Kaplan-Meier curves with Log-rank testing showing the length of stay in recognized (n=10) and unrecognized (n=10) patients with severe sepsis.
