# Supplementary material for: Sepsis recognition in the emergency department – impact on quality of care and outcome?
Source: PubMed Central journal article supplement (PMC5363055; doi:10.1186/s12873-017-0122-9), 2017-03-23
Supplement: 12873_2017_122_MOESM5_ESM.pdf [file 12873_2017_122_MOESM5_ESM.pdf]

## Additional file 5

Sepsis recognition in the emergency department - impact on quality of care and outcome?

Marius Morr, Alexander Lukasz, Eva Rübiger, Hermann Pavenstädt, Philipp Kümpers

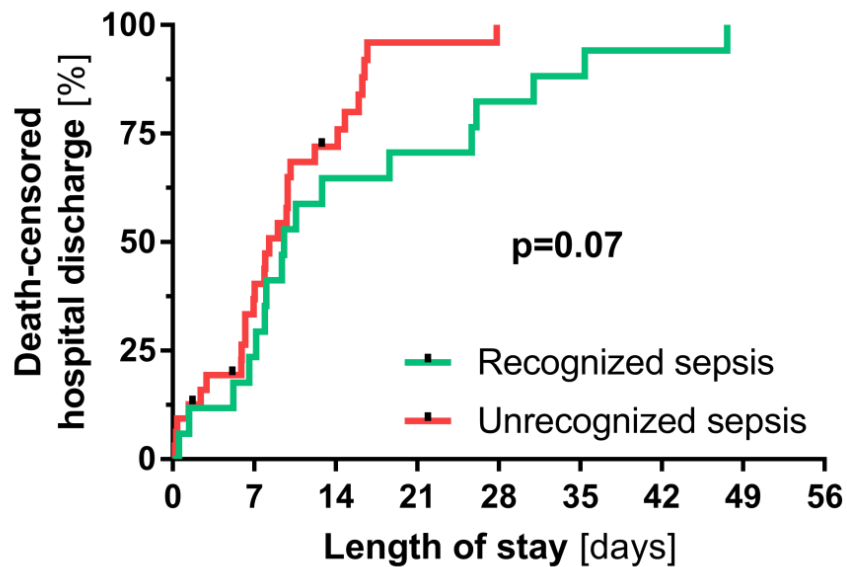

**Death-censored length of hospital stay according to sepsis recognition (Sepsis-3 definitions).** Kaplan-Meier curves with log-rank testing showing the length of stay in recognized (n=17) and unrecognized (n=32) patients with sepsis.
